# Supplementary material
Source: PubMed Central journal article supplement (PMC5940564)
Supplement: NIHMS951684-supplement-ESM.pdf [file NIHMS951684-supplement-ESM.pdf]

**ESM Table 1. Immunoblot antibodies.**

| Primary Antibody             | Supplier                  | Dilution |
|------------------------------|---------------------------|----------|
| Akt                          | Cell Signaling Technology | 1:1000   |
| Phosphorylated Akt (Ser 473) | Cell Signaling Technology | 1:1000   |
| PKCε                         | Cell Signaling Technology | 1:1000   |
| Na/K ATPase                  | Abcam Inc.                | 1:2000   |
| GAPDH                        | Santa Cruz Biotechnology  | 1:3000   |
| β-Actin                      | Sigma                     | 1:5000   |

**ESM Table 2. Quantitative PCR primer sequences.**

| Gene                               | Forward                    | Reverse                   | Ref |
|------------------------------------|----------------------------|---------------------------|-----|
| <i>TBP</i> (H)                     | CACAGTGAATCTTGGTTGTAACTTGA | AAACCGCTGGGATTATATTCG     |     |
| <i>ANGPTL8</i> (H)                 | CTGGGCCCTGCCTACCGAGA       | CCGATGCTGCTGTGCCACCA      | [1] |
| β-actin ( <i>Actb</i> ) (R)        | CCAGATCATGTTTGAGACCTTC     | CATGAGGTAGTCTGTCAGGTCC    |     |
| <i>Angptl8</i> (R)                 | CAGAGCCGGCCCAATATGAA       | GTGCTTGGTCAAAAAGGCC       |     |
| <i>Cd68</i> (R)                    | CACCTGGACCTGCTCTCCCTGA     | CTGGCGCAAGAGAAGCATGGC     |     |
| <i>Angptl3</i> (R)                 | GCACCAAGAACTACTCCCC        | AAATGGCAGAGCAGTCAGCA      |     |
| <i>Angptl4</i> (R)                 | CCTCCGAGGGGACCTTA          | AGATTGGAATGGCTGCAGGT      |     |
| <i>Apoc3</i> (R)                   | GAACAAGCCTCCAAGACGGT       | GGGATTTGAAGCGATTGTCC      |     |
| <i>ApoE</i> (R)                    | AGTGCCCCTGGAGAATCAA        | CACCTGGCTGGTCATGGAT       | [2] |
| <i>Apoc1</i> (R)                   | CTGATCGTGGTCGTAGCCAT       | GGTAAGCTCTCCATTGCGCT      |     |
| <i>ApoA5</i> (R)                   | GCCTGGGAAGGAGCCTCCTCGGC    | GCTCCATCAGCTCGACCGTGTAGGG | [3] |
| Hepatic Lipase ( <i>LipE</i> ) (R) | GAACACAGTGCAGACCATAATGCT   | TTCAGGTACATTTACGAAGACTT   | [4] |
| β-actin ( <i>Actb</i> ) (M)        | CCAGATCATGTTTGAGACCTTC     | CATGAGGTAGTCTGTCAGGTCC    |     |
| <i>Angptl8</i> (M)                 | AGCTGACCCTGCTCTTTCAC       | TGCTCTGTCATAGAGGCCCA      |     |

ANGPTL8: Angiopoietin-Like 8; TBP: TATA-Binding Protein; ANGPTL3: Angiopoietin-Like 3; ANGPTL4: Angiopoietin-Like 4; (H): Human; (R): Rat; (M): Mouse.

**ESM Table 3. Additional rat WAT variables.** Data are the mean  $\pm$  SEM of n = 6 (plasma leptin groups), n =7 (plasma adiponectin groups), n=8 (*Cd68* expression groups).

|                                                             | Control ASO                       | ANGPTL8 ASO                       | <i>p</i>    |
|-------------------------------------------------------------|-----------------------------------|-----------------------------------|-------------|
| <b>Fasting Leptin (ng/mL)</b>                               | <b>1.5 <math>\pm</math> 0.4</b>   | <b>1.1 <math>\pm</math> 0.4</b>   | <b>0.51</b> |
| <b>Fasting Adiponectin (ng/mL)</b>                          | <b>12 <math>\pm</math> 2</b>      | <b>11 <math>\pm</math> 2</b>      | <b>0.78</b> |
| <b>Adipose <i>Cd68</i> Expression (Relative Expression)</b> | <b>1.00 <math>\pm</math> 0.11</b> | <b>1.35 <math>\pm</math> 0.12</b> | <b>0.05</b> |

## REFERENCES

- [1] Nidhina Haridas PA, Soronen J, Sadevirta S, et al. (2015) Regulation of Angiotensin-Like Proteins (ANGPTLs) 3 and 8 by Insulin. *The Journal of clinical endocrinology and metabolism* 100: E1299-1307
- [2] Yamagata K, Nakayama C, Suzuki K (2013) Dietary beta-carotene regulates interleukin-1beta-induced expression of apolipoprotein E in astrocytes isolated from stroke-prone spontaneously hypertensive rats. *Neurochem Int* 62: 43-49
- [3] Nowak M, Helleboid-Chapman A, Jakel H, et al. (2005) Insulin-mediated down-regulation of apolipoprotein A5 gene expression through the phosphatidylinositol 3-kinase pathway: role of upstream stimulatory factor. *Molecular and cellular biology* 25: 1537-1548
- [4] Mello T, Nakatsuka A, Fears S, et al. (2008) Expression of carboxylesterase and lipase genes in rat liver cell-types. *Biochemical and biophysical research communications* 374: 460-464

# ESM Figure 1

a

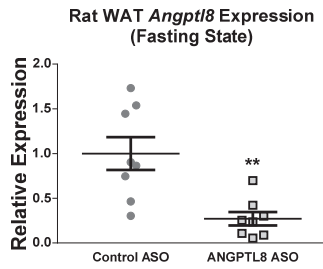

b

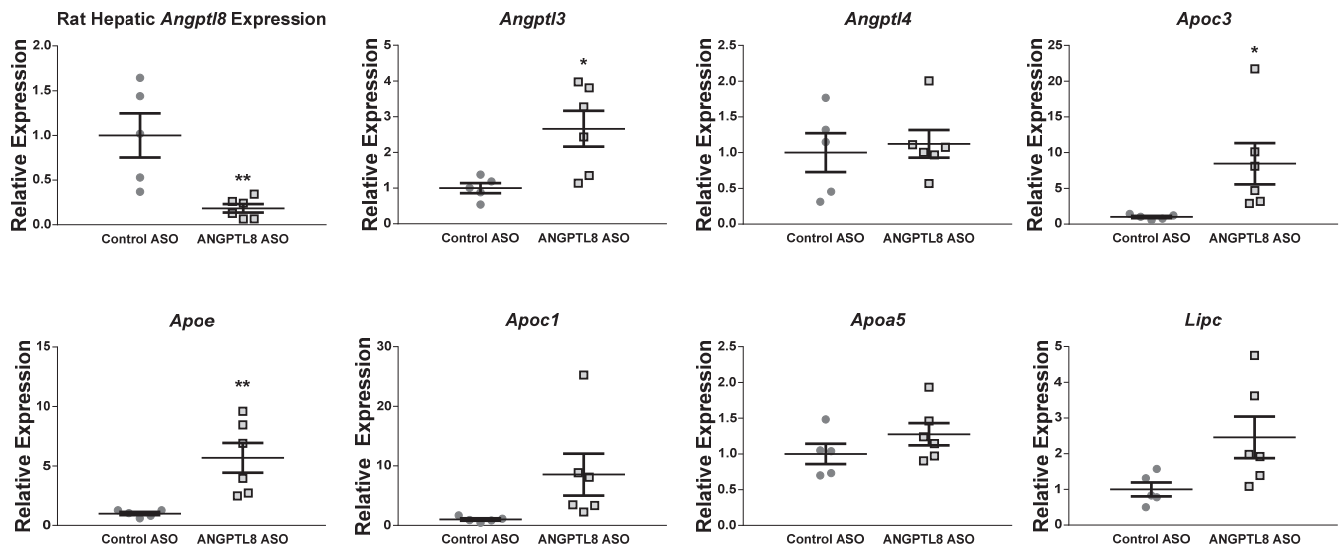

c

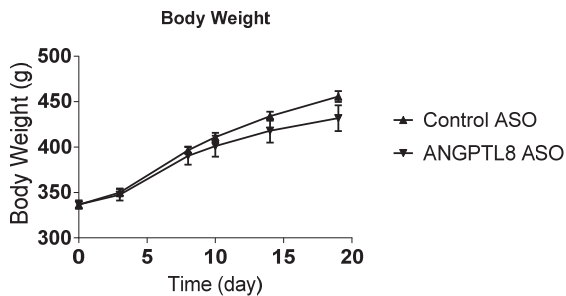

**ESM Figure 1.** a. Expression of *Angptl8* in rat epididymal adipose tissue assessed by qPCR. b. Rat hepatic expression of *Angptl8*, *Angptl3*, *Angptl4*, *Apoc3*, *Apoe*, *ApoC1*, *ApoA5*, and *Lipc* (Hepatic Lipase) assessed by qPCR. c. Growth curves assessed on HFD with ASO treatment. Data are the mean  $\pm$  SEM of  $n = 5-8$ . \*  $p < 0.05$ ; \*\*  $p < 0.01$ .

## ESM Figure 2

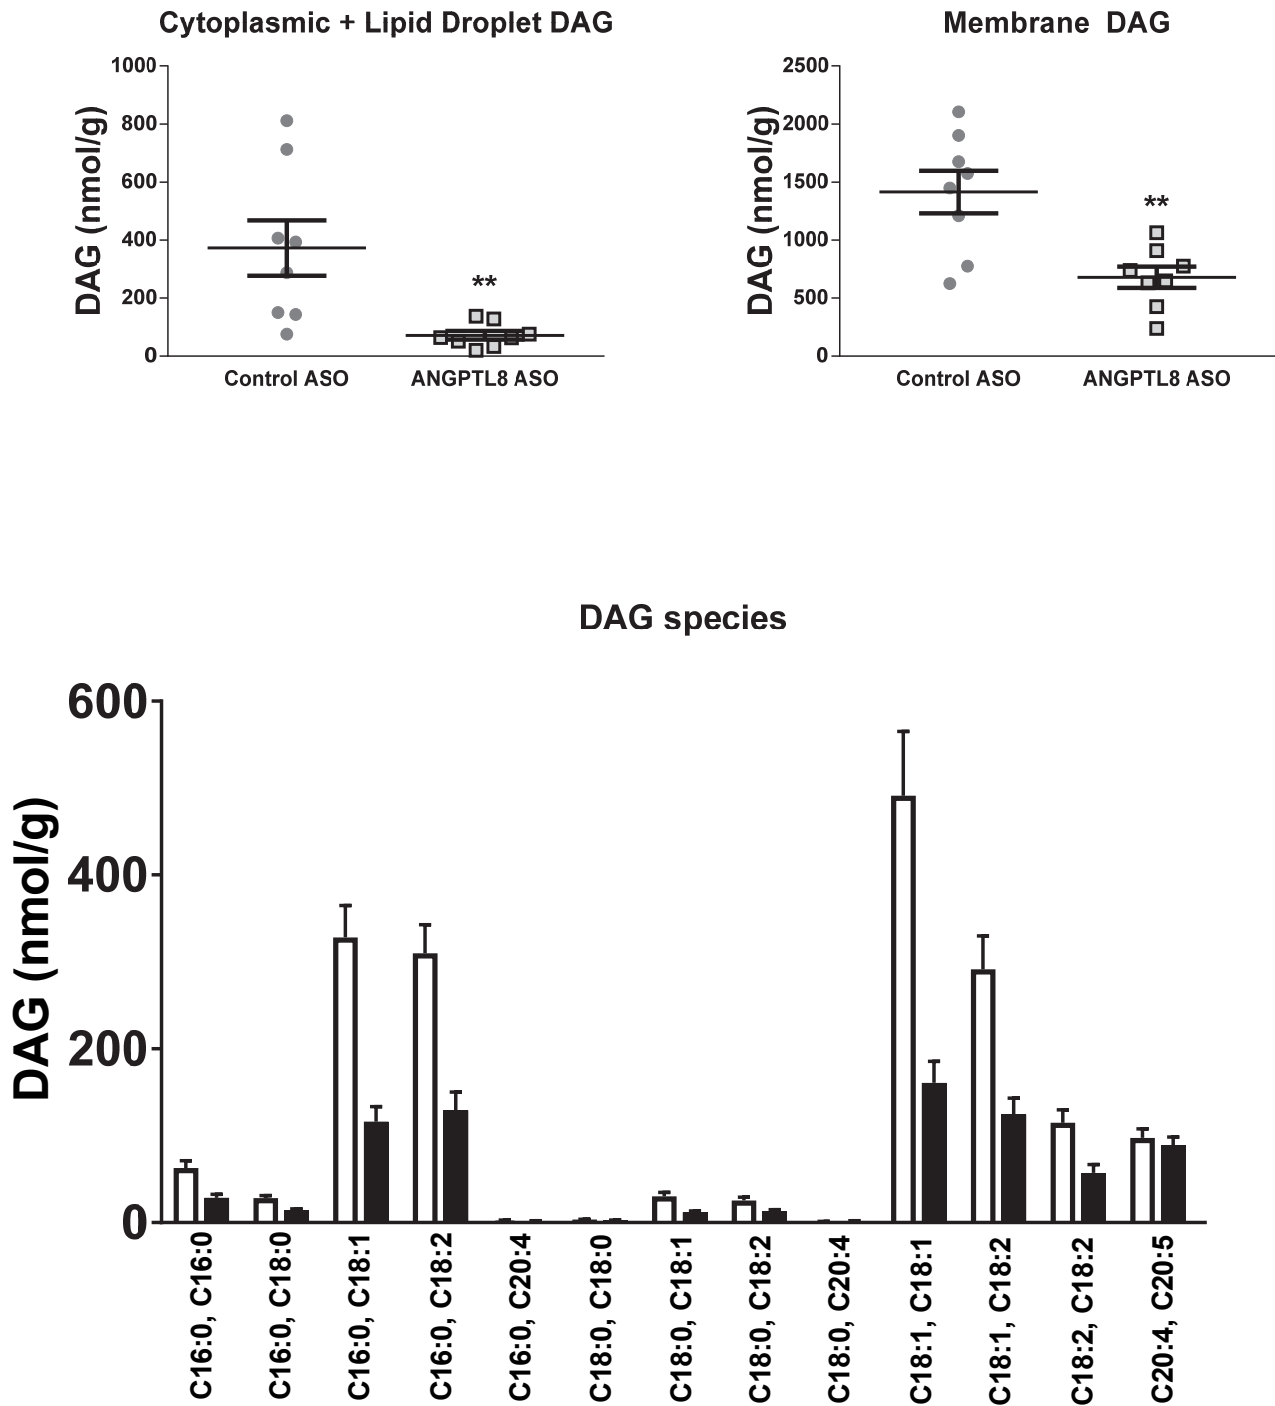

**ESM Figure 2. Hepatic diacylglycerol content by subcellular compartment and DAG species.** Assessed by LC-MS. For DAG species, white bars = control ASO, black bars = ANGPTL8 ASO. Data are the mean  $\pm$  SEM of  $n = 8$  (all groups).

# ESM Figure 3

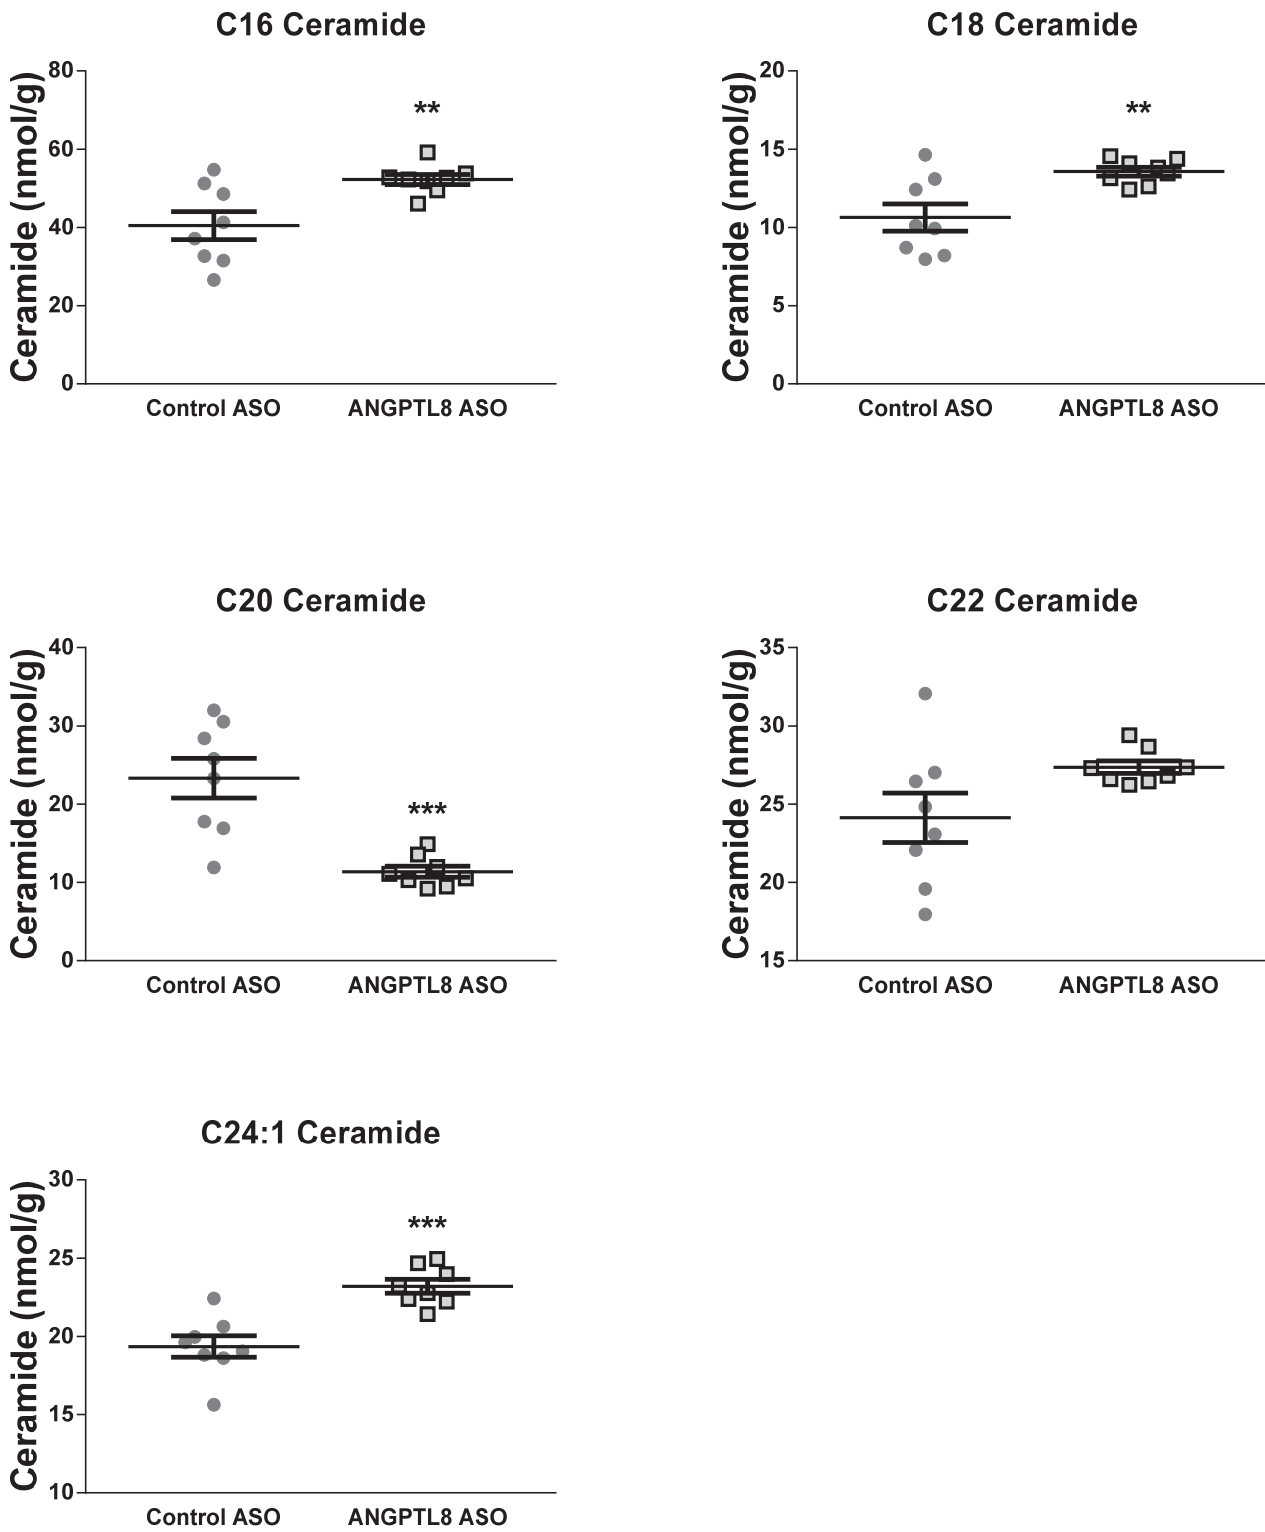

**ESM Figure 3. Hepatic ceramide species.** Assessed by LC-MS. Data are the mean  $\pm$  SEM of n = 8 (all groups). \*\*  $p < 0.01$ ; \*\*\*  $p < 0.001$ .

# ESM Figure 4

a

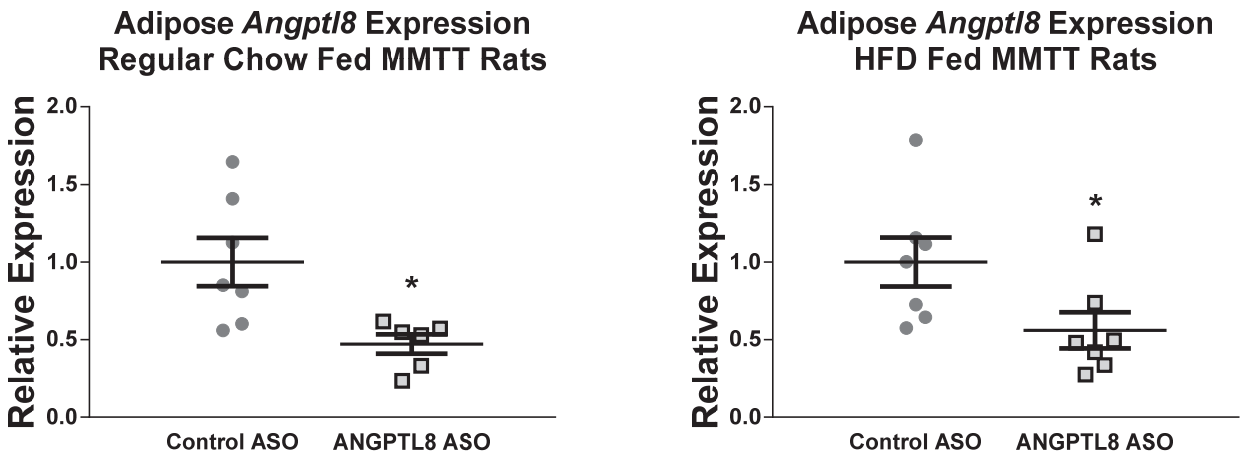

b

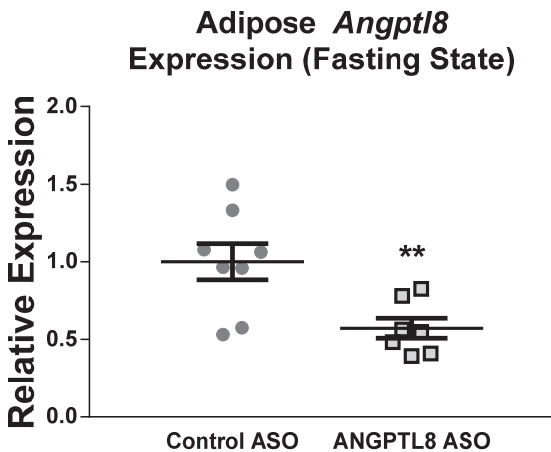

**ESM Figure 4. Adipose *Angptl8* expression.** a. Rat epididymal adipose *Angptl8* expression after one week ASO treatment, as assessed by qPCR. Data collected from rats studied in mixed meal tolerance tests. Data are the mean ± SEM of n = 7 (Regular Chow fed Control ASO, both groups HFD fed) or n = 6 (Regular Chow fed ANGPTL8 ASO). b. Expression of *Angptl8* in mouse epididymal adipose tissue assessed by qPCR. Data are the mean ± SEM n = 8 (control ASO) or mean ± SEM of n = 7 (ANGPTL8 ASO). \*  $p < 0.05$ ; \*\*  $p < 0.01$ .

# ESM Figure 5

a

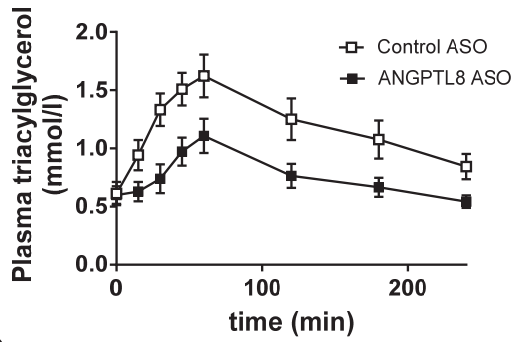

b

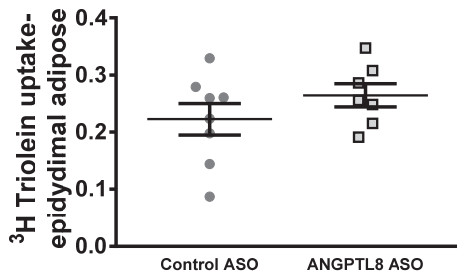

c

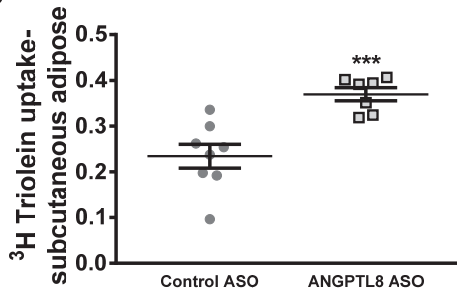

d

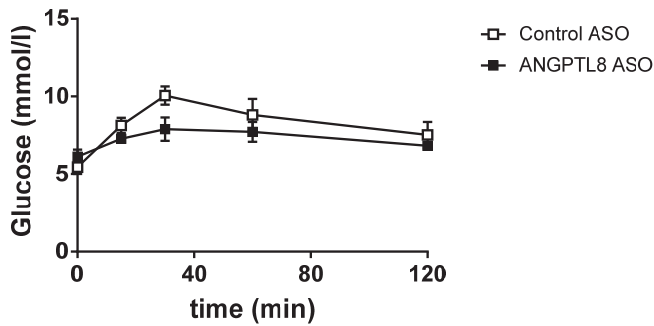

f

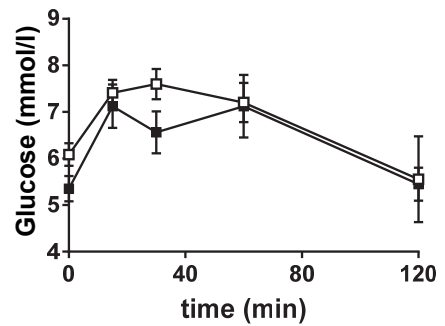

e

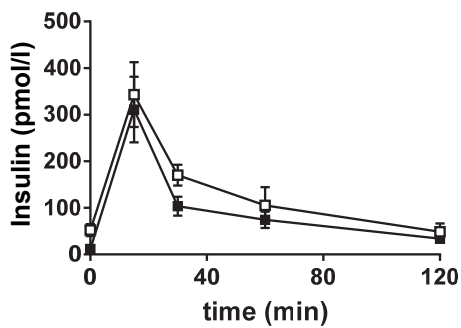

g

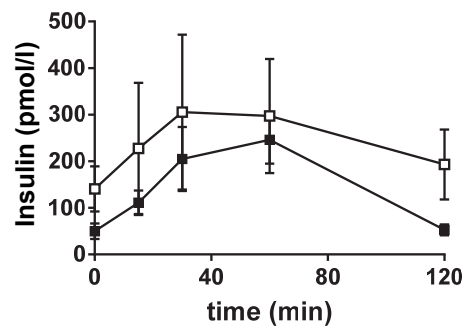



**ESM Figure 5. Mixed meal tolerance test (MMTT) tissue triacylglycerol uptake.** Tissue lipid uptake assessed four hours after delivery of mixed meal. Adipose tissue triacylglycerol uptake (counts per milligram tissue) is normalized to hepatic triacylglycerol uptake (counts per milligram tissue). a. Plasma triacylglycerol concentration during the MMTT in regular chow fed rats. b. Epididymal adipose and c. subcutaneous adipose triacylglycerol uptake after MMTT in regular chow fed rats. d. Plasma glucose and e. insulin concentrations during the MMTT in regular chow fed rats. f. Plasma glucose and g. insulin concentrations during the MMTT in high fat diet fed rats. Tissue triacylglycerol uptake data are the mean  $\pm$  SEM of n = 7-8; plasma glucose and insulin data are the mean  $\pm$  SEM of n = 4-7. \*\*\*  $p < 0.001$ .

ESM Figure 6

Regular Chow Fed

High Fat Fed

a

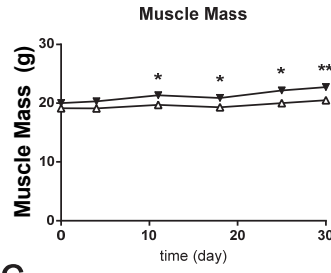

b

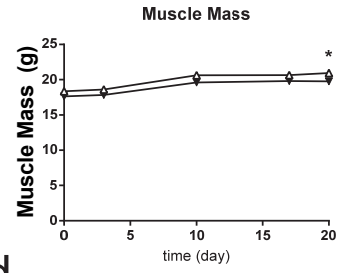

c

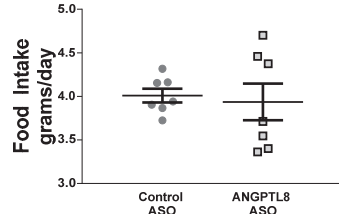

d

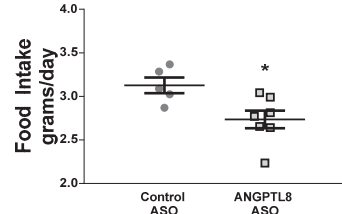

e

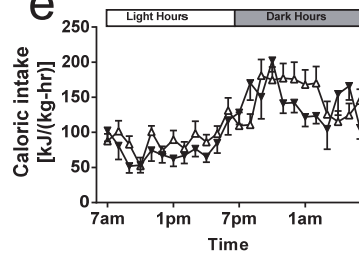

f

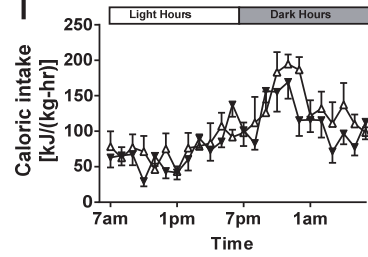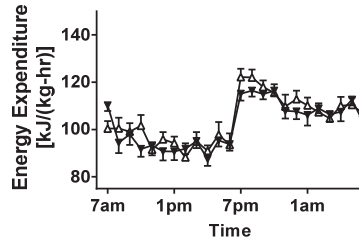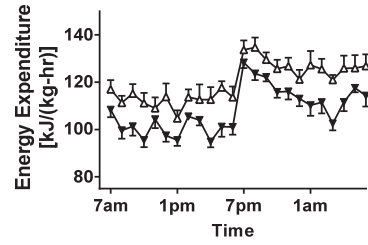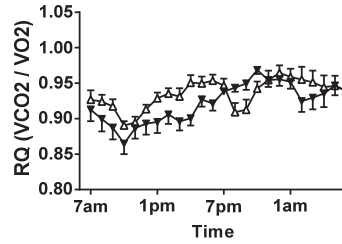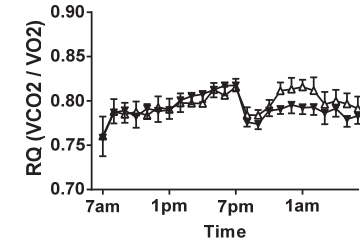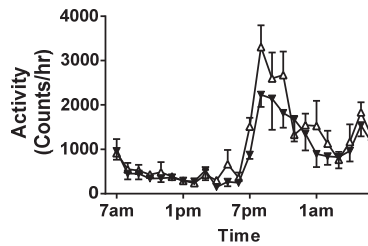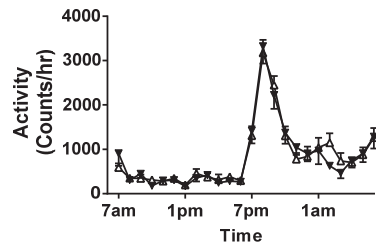

**ESM Figure 6. Additional data regarding murine growth curves and energy homeostasis.** Open triangles = Control ASO; Filled triangles = *Angptl8* ASO. a+b. Growth curve reproduced from Figure 6 in the main text. Muscle mass growth curve calculated from <sup>1</sup>H MRS assessment of fat mass. c+d. Averaged hourly metabolic cage data normalized to lean mass, including food intake, energy expenditure, respiratory quotient, and activity. Daily averages of food intake, energy expenditure, and Rq are represented in Figure 6. For RC fed growth curves, energy expenditure, and Rq data are the mean ± SEM of n = 8 in both groups. For HFD fed growth curves, data are the mean ± SEM of n = 7 (control ASO) or mean ± SEM of n = 8 (*Angptl8* ASO). For RC fed food intake, and HFD fed energy expenditure and Rq data are the mean ± SEM of n = 7 in both groups. For HFD fed food intake, data are the mean ± SEM of n = 5 (control ASO) or mean ± SEM of n = 7 (*Angptl8* ASO). \*  $p < 0.05$ ; \*\*  $p < 0.01$ .
